# Supplementary material
Source: MDPI journal article supplement (https://www.mdpi.com/2673-7272/3/1/2)
Supplement: s1 [file s1]

## Supplementary material

### **Individual interview questions for people with disabilities**

The following questions relate to the experience you have had in the context of confinement due to the Covid-19 pandemic and that you are now living in connection with the restrictive measures put in place:

a) Could you first remind me of the category(ies) of impairment or disability that you have:

- 01 Vision
- 02 Hearings
- 03 Mobility
- 04 Flexibility
- 05 Dexterity
- 06 Pain
- 07 Learning
- 08 Developmental / autism spectrum disorder
- 09 Intellectual
- 10 Mental Health
- 11 Memory/cognitive
- 12 Other (please specify): \_\_\_\_\_
- 99 I prefer not to answer

b) Which diagnosis(es) apply(s) to you:

- 01 Traumatic brain injury
- 02 Spinal cord injury
- 03 Stroke
- 04 Amputation
- 05 Multiple sclerosis
- 06 Other neurodegenerative disease
- 07 Autism Spectrum Disorder (ASD)
- 08 Global developmental delay
- 09 Intellectual disability
- 10 Developmental Coordination Disorder (DCD)
- 11 Developmental language disorder
- 12 Attention deficit disorder with or without hyperactivity (ADHD)
- 13 Other (please specify): \_\_\_\_\_
- 99 I prefer not to answer

1. Tell me about how the lockdown went for you and your loved ones (spouse, kids, friends, etc.) (Spring vs. Summer vs. Fall)?

✓ Tell me about the difficulties or the most difficult things, the good times, the strategies you have developed, etc.?

2. Tell me about how public authorities (e.g., government and public health) generally address the situation of people with disabilities in their interventions.

✓ How did you hear about the situation of people with disabilities?

3. How have the changes in services made in the context of Covid-19 impacted your daily activities and those of your loved ones?

✓ Describe the impacts for you and your loved ones.

## Supplementary material

✓ Do they question or have they questioned your autonomy?

4. Tell me about how you experience social distancing and its consequences for you and your loved ones, in terms of your interpersonal relationships?

5. What would you have liked the public authorities (e.g., Institut de réadaptation en déficience de Québec (IRDPQ), Centre intégré universitaire de santé et de services sociaux de la Capitale-Nationale (CIUSSSCN), Ministère de la Santé et des Services sociaux (MSSS), etc.) to do to support you more in your daily activities during the confinement period/since the start of the pandemic?

6. SPECIFIC QUESTION FOR HEARING IMPAIRED OR DEAF PEOPLE: Describe to me the changes you are experiencing or have experienced in relation to Quebec Sign Language interpretation or oral interpretation services.

✓ Do they succeed, or have they succeeded in meeting your needs satisfactorily?

7. How do you see the future for you and your loved ones in the more or less near future, say when the social distancing measures are lifted or even after the end of Covid-19?

8. Finally, do you have any other concerns or information that you would like to share with us in relation to the Covid-19 pandemic?
